1 **Experimentally Induced Metamorphosis in Axolotl (*Ambystoma mexicanum*) Under**  
2 **Constant Diet Restructures Microbiota Accompanied by Reduced Limb**  
3 **Regenerative Capacity**

4

5 **Turan Demircan<sup>1,6\*</sup>, Guvanch Ovezmyradov<sup>2,6</sup>, Berna Yıldırım<sup>6</sup>, İlknur Keskin<sup>3,6</sup>,**  
6 **Ayşe Elif İlhan<sup>6</sup>, Ece Cana Feşcioğlu<sup>6</sup>, Gürkan Öztürk<sup>4,6</sup>, Süleyman Yıldırım<sup>5,6\*</sup>**

7

8

9 <sup>1</sup>Department of Medical Biology, International School of Medicine, İstanbul Medipol University,  
10 İstanbul, Turkey.

11 <sup>2</sup>Department of Biostatistics and Medical Informatics, International School of Medicine, İstanbul  
12 Medipol University, İstanbul, Turkey.

13 <sup>3</sup>Department of Histology and Embryology, School of Medicine, İstanbul Medipol University,  
14 İstanbul, Turkey.

15 <sup>4</sup>Department of Physiology, International School of Medicine, İstanbul Medipol University,  
16 İstanbul, Turkey.

17 <sup>5</sup>Department of Microbiology, International School of Medicine, İstanbul Medipol University,  
18 İstanbul, Turkey.

19 <sup>6</sup>Regenerative and Restorative Medicine Research Center, REMER, İstanbul Medipol University,  
20 İstanbul, Turkey.

21

22 \*To whom correspondence may be addressed:

23 Süleyman Yıldırım. PhD

24 İstanbul Medipol University, International School of Medicine, Kavacik, İstanbul, Turkey. Tel:  
25 +90-216-681-5100, Fax: +90-212-531-7555,

26 E-mail: [suleymanyildirim@medipol.edu.tr](mailto:suleymanyildirim@medipol.edu.tr)

27

28 Turan Demircan, PhD,

29 İstanbul Medipol University, International School of Medicine, Kavacik, İstanbul, Turkey. Tel:  
30 +90-216-681-5100, Fax: +90-212-531-7555,

31 E-mail: [tdemircan@medipol.edu.tr](mailto:tdemircan@medipol.edu.tr)

32

33

34

35

36

37

38 **Abstract**

39 Axolotl (*Ambystoma mexicanum*) is a critically endangered salamander species and a  
40 model organism for regenerative and developmental biology. Despite life-long neoteny in  
41 nature and in captive-bred colonies, metamorphosis of these animals can be  
42 experimentally induced by administering Thyroid hormones (THs). However, biological  
43 consequences of this experimental procedure, such as host microbiota response and  
44 implications for regenerative capacity, remain largely unknown. Here, we systematically  
45 compared host bacterial microbiota associated with skin, stomach, gut tissues and fecal  
46 samples based on 16S rRNA gene sequences, along with limb regenerative capacity,  
47 between neotenic and metamorphic Axolotls. Our results show that distinct bacterial  
48 communities inhabit individual organs of Axolotl and undergo substantial restructuring  
49 through metamorphosis. Drastic restructuring was observed for skin microbiota,  
50 highlighted by a major transition from *Firmicutes*-enriched to *Proteobacteria*-enriched  
51 relative abundance and precipitously decreased diversity. Remarkably, shifts in  
52 microbiota was accompanied by a steep reduction in limb regenerative capacity. Fecal  
53 microbiota of neotenic and metamorphic Axolotl shared relatively higher similarity,  
54 suggesting that diet continues to shape microbiota despite fundamental transformations in  
55 the host digestive organs. The results provide novel insights into microbiological and  
56 regenerative aspects of Axolotl metamorphosis and will establish a baseline for future in-  
57 depth studies.

58

59

60

61

## 62 **Introduction**

63

64 Metazoan genomes have diversified and evolved in the presence of associated host  
65 microbiota. The evolution of morphology and function of animal organ systems may have  
66 been influenced by interactions with their microbial partners <sup>1</sup>. From the host perspective,  
67 symbioses between metazoans and microbes provide a synergetic impact to operate  
68 essential functions for normal growth, development and behavior <sup>2-4</sup>. Studies on host-  
69 microbiome interactions in health and disease conditions indicate that perturbation of the  
70 crosstalk between the host and microorganisms may lead to deleterious consequences  
71 such as developmental defects <sup>3,5</sup>, increased susceptibility to infectious diseases <sup>6,7</sup> and  
72 ultimately fitness costs <sup>8</sup>. Even though host genotypes <sup>9</sup> and environmental factors, such  
73 as diet and habitat <sup>10,11</sup>, were shown to strongly impact the composition and structure of  
74 animal microbiota, ecological forces shaping assembly of the host associated microbial  
75 communities have still been poorly understood.

76

77 Amphibians, which undergo dramatic morphological changes through metamorphosis,  
78 exhibit explicitly altered biphasic life stages to tackle developmental challenges.  
79 Remarkably, metamorphosis in several marine animal species such as sponges, corals,  
80 crabs, sea urchins, and ascidians is mediated by bacterial community <sup>12</sup>. Thyroid hormones  
81 (THs) are key players in initiation and completion of metamorphosis <sup>13,14</sup>. Natural  
82 accumulation (as in anurans) or administration (as in Axolotl) of THs leads to critical  
83 reorganization of organs in order to adapt terrestrial life conditions. This adaptive process  
84 includes reconstruction or loss of some existing organs and extremities, and formation of  
85 new ones <sup>15,16</sup>. A prominent example of reconstruction is observed in digestive tract of  
86 tadpole. In adult frogs acidic stomach and shorter intestine originate from non-acidic

87 stomach and long intestine of tadpole digestive tract<sup>17,18</sup>. Growing evidence supports the  
88 notion that reshaping of organs and composition of microorganisms reciprocally influence  
89 each other as functions of bacterial communities are increasingly being linked to host  
90 metabolic activities<sup>19-21</sup>. Hence, unraveling microbiome compositions in various life  
91 stages may offer new insights into the life stage-specific microbial patterns.

92

93 Axolotl (*Ambystoma mexicanum*), a salamander species of amphibians, possess  
94 experimentally validated features, such as high regenerative capacity<sup>22</sup>, low cancer  
95 incidence<sup>23</sup>, scarless wound healing<sup>24</sup>, life-long neoteny with the ability to undergo  
96 induced metamorphosis<sup>25</sup>. These characteristics contributed to the recent establishment  
97 of Axolotl as a promising vertebrate model organism for regenerative and developmental  
98 biology (reviewed in<sup>26</sup>). Reference resources for this model such as transcriptome<sup>27,28</sup>  
99 and a draft genome assembly<sup>29</sup> are publicly available. Current studies on regeneration in  
100 Axolotl have focused on identification of genes, gene networks and pathways activated  
101 during limb and tail regeneration by utilizing transcriptome and proteome profiling tools  
102<sup>16,27,30,31</sup>. Nevertheless, there is very limited data on microbial diversity of salamanders<sup>32</sup>  
103 and systematic investigation of microbiota diversity in multiple organs of salamander  
104 species, particularly that of Axolotl, has been missing in the literature.

105

106 In this study, we hypothesized that induction of metamorphosis in Axolotl leads to  
107 restructuring of bacterial microbiota due to reorganization of tissues via metamorphosis.  
108 We then asked whether such microbiota restructuring is accompanied by changes in the  
109 host regenerative capacity. To test the hypothesis and answer the question, we explored  
110 the variation in neotenic and metamorphic Axolotl's microbiota associated with skin,  
111 stomach, gut tissues (crypts), and feces using 16S rRNA gene sequencing and compared

112 limb regenerative capacity between two developmental stages. The results provide novel  
113 insights into relationship between perturbed microbial communities due to host factors  
114 and putative implication of microbiota in regeneration capacity.

115

## 116 **Results**

117 Details of the experimental design were described in the methods section (Fig. 1). Within  
118 2-3 weeks of hormonal treatment of the animals, we observed weight loss, progressive  
119 disappearance of the fin and decrease in the gills size; and in approximately two months  
120 all animals showed characteristics of accomplished metamorphosis (Fig. 2a). We first  
121 performed comparative analysis of microbiota between neotenic and metamorphic  
122 Axolotl organs. We then attempted to answer the question whether shifts in microbiota  
123 might be accompanied by a change in host regenerative capacity since previous studies  
124 provided evidence that limb regenerative capacity is reduced in metamorphic Axolotl<sup>33</sup>.  
125 We reproduced these observations in this study that regeneration is indeed impeded in the  
126 limbs of metamorphic Axolotl (Fig. 2b). We observed that all neotenic animals (n=15)  
127 regenerated (day 64) the limb in a miniaturized form with four digits. In contrast, slower  
128 blastema formation and regeneration process were apparent in metamorphic animals. We  
129 continued to observe limb generation in metamorphic Axolotls up to day 150. At day 150,  
130 2 of 15 metamorphic Axolotls (13 %) restored the limb with four digits. Also, 4 of 15  
131 metamorphic animals (27 %) were capable of regenerating amputated limb with 3 digits  
132 only. In addition, another 4 animals (27 %) restored limb with only two digits were  
133 observed. Rest of the animals (5 out of 15) failed to regenerate a limb to any extent,  
134 indicating that the limb generation capacity in metamorphic Axolotls is severely impeded.

135

136 *Bacterial community structure and membership differ between neotenic and*

137 ***metamorphic Axolotl***

138

139 Sequencing of the V3-V4 region of the 16S rRNA gene produced approximately 3.7M  
140 reads generated from 27 samples (24 samples from Axolotls and 3 aquarium water  
141 samples, hereinafter “Aqua”). The sequences were clustered into 14451 high quality,  
142 singleton, chloroplast, and mitochondria removed and chimera-checked Operational  
143 Taxonomic Units (OTUs). Average amplicon sequences per sample was  $139059 \pm 49159$   
144 sequences). Our data included 12224 (85% of total) *de novo* OTUs (OTU IDs that begin  
145 with “New.Reference” or “New.Cleanup.Reference”). We then classified a representative  
146 sequence of these OTUs using RDP classifier (v. 2.2) at 70% bootstrap cutoff. We  
147 identified 621 OTUs that did not find hits in the RDP database even at the phylum level  
148 (“Unclassified Bacteria”). We thus used MOLE-BLAST to determine their identity.  
149 Except a few high abundance OTUs (~5% abundance) enriched in the stomach samples  
150 hitting plant mitochondria (discarded), most of these OTUs had abundance below 0.1%,  
151 which can be considered a rare OTU <sup>34</sup>. The majority of these OTUs were  
152 phylogenetically related to the phylum *Proteobacteria* or *Verrucobacteria*  
153 (Supplementary Fig. S1; NCBI Accession numbers: MG518658 - MG519278).

154

155 Species richness and diversity were analyzed using a variety of alpha-diversity metrics  
156 across neotenic and metamorphic samples (Fig. 3a-d). Metamorphosis significantly  
157 reduced diversity in fecal and skin samples as follows; Chao1 and Observed OTUs were  
158 significantly lower in fecal and skin samples of the metamorphic samples as compared to  
159 neotenic samples (Unpaired Student t test,  $df=4$ ,  $p=0.0018$ ,  $p=0.0005$ , respectively). But  
160 Inverse Simpson and Shannon indices were not significantly different ( $p=0.34$ ,  $p=0.07$ )  
161 for these two particular samples although Faith’s phylogenetic tree (PD) did indicate that

162 microbiota diversity of these samples were significantly different from each other  
163 ( $p=0.0022$ ,  $p=0.0005$ , respectively). Both Simpson and Shannon indices take into  
164 account richness and evenness in computing the metrics. Therefore, taxa with high  
165 relative abundance being heavily weighted in calculations while the indices are less  
166 sensitive to rare taxa when compared to richness only metrics<sup>35</sup>. Interestingly, evenness  
167 as calculated by Simpson-E index was not significantly different between any sample  
168 pairs ( $p>0.05$  for all comparisons). Correspondingly, we inferred that low abundant taxa  
169 drive differences in diversity in fecal and skin samples. Both stomach and gut samples  
170 had richness and diversity that were not significantly different on all metrics between  
171 neotenic and metamorphic animals ( $p>0.05$ ; Fig. 3a-d).

172

173 Beta diversity of bacterial communities largely differed between neotenic and  
174 metamorphic samples based on Bray-Curtis and Jaccard distance metrics (Fig. 4a; and  
175 Supplementary Fig. S2, respectively). Within and between group differences (Main-  
176 effect) using both distance metric were statistically significant as per PERMANOVA test  
177 ( $Pseudo-F(8, 18) = 7.82$ ,  $p(Monte Carlo)=0.0001$ ). Permutational test for homogeneity  
178 of dispersions (PERMDISP) was at the border of significance; ( $F(8, 18) = 8.357$ ,  $p(perm)$   
179  $= 0.0507$ , 9999 permutations of residuals), indicating that the average within group  
180 dispersions were marginally equivalent among groups but dispersion effect, to some  
181 degree, may be confounded in the location effect. We next employed Canonical analysis  
182 of principal coordinates (CAP, Anderson and Willis, 2003) based on Bray-Curtis distance  
183 matrix, a constrained ordination that maximizes the differences among a priori groups and  
184 reveals subtle patterns, which otherwise remain elusive to unconstrained ordinations.  
185 CAP analysis clearly separated neotenic and metamorphic samples (Fig. 4b) except for  
186 the fecal samples (Correct classification rate 96.3%; trace statistics ( $tr(Q_m'HQ_m)$ ):

187 3,92174  $p=0.001$  with 9999 permutations, supporting rejection of the null hypothesis of  
188 no difference among the sample groups).

189

190 *Firmucutes*, *Proteobacteria*, and *Bacteriodetes* constituted  $86.7\% \pm 8.8$  total average  
191 abundance across all Axolotl samples (Fig. 5a). Of these phyla, Proteobacteria abundance  
192 considerably increased in the skin (5.2% to 41.8%) and in the gut samples (2.7% to  
193 9.1%). In contrast, the abundance of this phylum did not significantly change in the fecal  
194 samples yet decreased in the stomach samples (52.0% to 38.9%). Firmicutes abundance  
195 seemed to follow the opposite trend. We thus employed Pearson's correlation to identify  
196 phylum level taxa (Supplementary Fig. S3) whose abundances negatively correlate as a  
197 result of metamorphosis. Abundances of Proteobacteria and Firmicutes along with  
198 Verrucomicrobia showed the strongest negative correlation (correlation coefficients were  
199  $r = -0.64$  and  $-0.54$ , respectively), which was also significant (False Discovery Rate (FDR)  
200 adjusted  $q = 0.0027$  and  $0.026$ , respectively). Interestingly, the phylum Bacteriodetes  
201 abundance in all samples substantially increased after metamorphosis (56.7% vs. 74.2%  
202 in fecal samples; 2.5% vs. 29.7% in gut samples; 11.6% vs. 17.5% in skin samples) and  
203 negatively correlated with both Firmicutes and Proteobacteria (although this result was  
204 not significant ( $q=0.4$ ). Overall, The Axolotl skin microbiota, among others, showed most  
205 dramatic shifts between neotenic and metamorphic stages considering these negatively  
206 correlated taxa.

207

208 Percent average abundances of the genus level taxa are shown in a heatmap (Fig. 5b; for  
209 simplicity only taxa abundance  $\geq 5\%$  in any sample were shown). Samples were grouped  
210 based on Bray-Curtis similarities (top dendrogram) and abundances were clustered using  
211 hierarchical clustering (average linkage). The observed differences between group



212 similarities were driven by differences in the relative abundance of multiple bacterial  
213 taxa. For example, metamorphic skin samples clustered with stomach samples of neotenic  
214 and metamorphic Axolotl; *Clostridium IV*, *Bacteriodes*, and *Sphingomonas* were  
215 abundant in these samples. Notably, the genus *Elizabethkingia* were observed in high  
216 abundance in the skin and the stomach samples of the metamorphic Axolotl.  
217 Metamorphic gut sample clustered with the fecal samples; *Akkermansia* and *Bacteriodes*  
218 being in greater abundance in these samples. Finally, neotenic gut and skin samples were  
219 grouped together. This pattern was chiefly due to taxa that could not be classified at genus  
220 level (*unclassified Veillonellaceae*, *unclassified\_Ruminococcaceae*,  
221 *unclassified\_Lachnospiraceae*) and *Clostridium XIVa*. Remarkably, Aqua water samples  
222 did not have any taxa with high abundance shared with any samples from Axolotl, and  
223 separated from other samples.

224

### 225 ***Indicator and Shared Species of Neotenic and Metamorphic Axolotl***

226

227 We next used DESeq2 analysis, a negative Binomial Wald Test<sup>36,37</sup> to identify  
228 differentially abundant taxa ( $q < 0.01$ ) in neotenic and metamorphic Axolotl organs at the  
229 genus level taxonomy. We also performed indicator species analysis to identify not only  
230 abundant and rare OTUs differentially enriched in these samples but also to delineate  
231 high fidelity differential patterns (IndVal values  $\geq 0.7$ ,  $p < 0.01$ ). We largely observed  
232 concordance between both analyses. Skin samples showed the highest number of  
233 differentially enriched genera (49 taxa in metamorphic skin samples and 36 taxa enriched  
234 in neotenic skin samples); *Pseudonocardia*, *unclassified\_Pseudonocardiaceae*,  
235 *Methylobacterium*, *Elizabethkingia*, *Vogesella*, *Chryseobacterium*, and *Zoogloea* were the  
236 top scoring genera in the metamorphic skin while *Limnohabitans* and several taxa that

237 were classified at higher taxonomic ranking were differentially abundant in the neotenic  
238 skin samples (Fig. 6a). These genera were also detected in the indicator species analysis  
239 in several OTUs. For example, OTU89, OTU141, OTU1052, OTU1301, OTU1450,  
240 OTU2081, were classified as *Pseudonocardia* and OTU89 had the highest abundance of  
241 15.3%. Similarly, the genus *Limnohabitans*, overrepresented in neotenic samples, was  
242 assigned to OTU1542 and OTU2587, although both OTUs had relative abundance  
243 (0.01%) that can be considered a rare OUT<sup>34</sup>. The following top scoring taxa were  
244 differentially abundant in metamorphic and neotenic samples, respectively; Stomach  
245 samples: *Elizabethkingia* (OTU335) and *Limnohabitans* (OTU46); gut samples:  
246 *Elusimicrobium*, which was not detected by IndVal but OTU7777  
247 (*Hydrogenoanaerobacterium*) was the top scoring taxa (IndVal =0.85,  $P =0.002$ );  
248 *unclassified\_Ruminococcaceae*, *unclassified\_Lachnospiraceae* were the indicator species  
249 of neotenic gut samples and finally *Odoribacter* (OTU14388), *Rikenella* (OTU14233)  
250 were both differentially abundant and indicator species of metamorphic fecal samples.

251

252 Venn diagrams showed number of OTUs shared among or unique for the samples isolated  
253 from Axolotl (Supplementary Fig. S4a and Fig. S4b). Number of unique OTUs in all  
254 samples of neotenic (7422 OTUs) and metamorphic Axolotl (6237 OTUs) was far greater  
255 than shared OTUs indicating assembly of microbiota is tissue specific as in most other  
256 animals<sup>38</sup>. In terms of shared OTUs, 368 and 329 OTUs were present in all neotenic and  
257 metamorphic samples, respectively. We also collected water samples (“Aqua”) from the  
258 Aquarium of Axolotl to identify OTUs present in the water that may have colonized the  
259 Axolotl skin (Fig. 7a). We found 89 OTUs were shared by the neotenic and metamorphic  
260 skin and Aqua samples; 38 OTUs were present only in the neotenic and Aqua samples  
261 while 105 OTUs were shared by metamorphic and Aqua samples. However, relative

262 abundances of all these OTUs were mostly less than 1%. We also compared unique and  
263 shared OTUs between gut tissue and fecal samples (Fig. 7b). Exceptionally, the number  
264 of OTUs in the metamorphic gut was 4999, representing substantial increase from 2961  
265 OTUs found in the neotenic gut. And the two gut tissue samples shared only 227 OTUs.  
266 In stark contrast, the number of unique OTUs decreased to 1365 OTUs whereas neotenic  
267 fecal sample had 3408 unique OTUs. Notably, the shared number of fecal and gut OTUs,  
268 neotenic or metamorphic, were 288 OTUs and 272 OTUs, suggesting the fecal and gut  
269 microbiota are compositionally distinct. Finally, we identified the following genera as  
270 core taxa, i.e. shared by 90% of all samples (Core90) (Supplementary Fig. S5):  
271 *Bacteroides*, *Clostridium XIVa*, *Clostridium XIVb*, *Akkermansia*, *Odoribacter*,  
272 *unclassified\_Veillonellaceae*, *unclassified\_Lachnospiraceae*, *Parabacteroides*,  
273 *unclassified\_Rhodospirillaceae*, *unclassified\_Ruminococcaceae*, *Rikenella*,  
274 *unclassified\_Clostridiales*, and *Desulfovibrio*.

275

### 276 ***Detection of Human taxa in Axolotl Samples and Predicted Functions***

277

278 To answer the question if the captive Axolotl may have acquired human bacterial taxa we  
279 compared Axolotl microbiota with HMP stool and skin samples (HMP reference data)  
280 using weighted and unweighted Unifrac distances (Supplementary Fig. S6 (a-d)). In  
281 particular, both neotenic and metamorphic stool and skin samples showed greater  
282 similarity to HMP samples compared to other Axolotl samples. These results encouraged  
283 us to look at predicted functions of the microbiota using Phylogenetic Investigations of  
284 Communities by Reconstruction of Unobserved States (PICRUSt) Due to the specific  
285 requirement by PICRUSt, a separate OTU table was generated accordingly using a closed  
286 reference analysis based on the GreenGenes 99 database version. CAP analysis of the

287 predicted functions revealed significant differences between the Bray-Curtis distances  
288 based on putative pathway abundances ( $\text{tr}(\text{Q\_m}'\text{HQ\_m})$ : 5,78539  $p=0.001$ ). However,  
289 Bray-Curtis similarities among all distinct groups were around 90%, pointing to the  
290 shared predicted functions among the bacterial microbiota of Axolotl organs  
291 (Supplementary Fig. S7).

292

## 293 **Discussion**

294

295 The main purpose of this study was to comparatively characterize bacterial microbiota of  
296 Axolotl in neotenic and metamorphic life stages since microbiota of this important  
297 biological model has not been reported before. We also asked if differential profiles of  
298 Axolotl microbiota in the examined life stages might be accompanied by a change in host  
299 regenerative capacity. Our results show that (a)- substantial shifts occurs in the structure  
300 and composition of microbiota, particularly in the skin but also in digestive organs; and  
301 that (b)- regenerative capacity in the limbs of metamorphic Axolotl steeply diminishes  
302 while neotenic Axolotl maintains normal regenerative capacity under identical conditions  
303 and that the shifts in the skin microbiota appears to be related to the reduced limb  
304 regenerative capacity. Although the scope of this report does not include pinpointing  
305 molecular mechanisms accounting for the reduced limb regeneration and its putative  
306 association with microbiota, our observations align well with recently published  
307 experimental evidence supporting the conclusion that limb regenerative capacity of  
308 Axolotl diminishes upon metamorphosis<sup>33,39</sup>. Crucially, our ongoing experiments suggest  
309 that reduced regenerative capacity is not observed for some other types of tissues in  
310 metamorphic Axolotl (Demircan *et al.*, unpublished data).

311

312 We detected drastic expansion of Proteobacteria in metamorphic Axolotl skin relative to  
313 the neotenic skin and noted steep decrease of bacterial diversity in the fecal and skin  
314 samples (see Fig. 3). Evidence of skin dysbiosis and the linkage of members of  
315 Proteobacteria to reduced regenerative capacity comes from the study by <sup>40</sup>; in this study  
316 pathogenic shifts in microbiota and infections were implicated in reduced regeneration in  
317 planaria, a model for tissue regeneration; Although the abundance of *Vogesella*,  
318 *Pseudomonas*, and *Sphingomonas*, all a member of Proteobacteria, and  
319 *Chryseobacterium* within Bacteroidetes phylum were virtually not detected in neotenic  
320 planarian skin samples, the abundance of these genera considerably increased in the skin  
321 of the metamorphic planarian and these genera demonstrably impeded TAK1/MKK/p38  
322 signaling pathway of the innate immunity of the planarian host. Strikingly, our analysis  
323 revealed that abundance of these genera and some other members of Proteobacteria  
324 known to cause nosocomial infections were, too, highly significantly increased in the  
325 metamorphic skin samples from Axolotl (Fig6a and 6b); *Vogesella* ( $q=7.4E-11$ );  
326 *Chryseobacterium* ( $q=5.4E-12$ ); *Undibacterium* ( $q=7.01E-11$ ), and *Sphingomonas*  
327 ( $q=4.03E-09$ ). The average abundance of *Pseudomonas*, too, increased (from 0.1% in  
328 neotenic skin to 2.2% in metamorphic skin) but the increase was barely significant after  
329 FDR correction for multiple testing ( $q=0.056$ ). Furthermore, infiltration of macrophages,  
330 as key players of innate immune system, to the site of amputation and cellular signaling  
331 pathways in Axolotl were shown to play crucial role in Axolotl limb regeneration <sup>41</sup>,  
332 lending further credence to the role dysbiotic microbiota can play in reducing the limb  
333 regenerative capacity by probably impeding signaling pathways of macrophages. Indeed,  
334 macrophages are crucial in removing cellular debris and regulating the balance between  
335 fibrosis and scarring <sup>42,43</sup>. Metamorphosis leads to remarkable alterations in immune  
336 system such as expression of antimicrobial peptides in epidermis, increase in lymphoid

337 cells ratio and increasingly antigen responsive B cells, and corticosteroid-mediated  
338 apoptosis of susceptible lymphocytes<sup>44</sup>. Considering the cross talk between microbes and  
339 the immune system, transformation of skin immunity (thickening mucus layer and  
340 increased secretion of antimicrobial peptides) may partly account for the disruption of  
341 microbiota after metamorphosis. Importantly, disruption in microbiota increases the risk  
342 of pathogen infection and overgrowth of opportunistic pathogens during complete  
343 metamorphosis as in the example of *Galleria mellonella*, leading to fitness costs<sup>8</sup>. Taken  
344 together, the body of evidence on metamorphosing host microbe interactions support the  
345 conclusion that dysbiotic restructuring microbiota in Axolotl skin may have contributed  
346 to the reduction in limb regeneration. However, further experiments must be performed to  
347 ascertain direct mechanistic evidence supporting the cross talk between members of  
348 Proteobacteria and blastema pathways involved in regeneration. Future experiments  
349 should also include eukaryotic microbiota since fungal skin infections (e.g.  
350 chytridiomycosis) in amphibians adversely affects the vital function of amphibian skin  
351<sup>45,46</sup>.

352

353 The results from this study add to the emerging appreciation for the broader roles of  
354 microbiota in regeneration and wound healing<sup>47-50</sup>. Conceivably, both intrinsic (e.g. age,  
355 morphology) and extrinsic factors (e.g. diet, microbiota) may contribute to reduced limb  
356 regenerative capacity of the metamorphic Axolotl. Even though we cannot rule out other  
357 subtle intrinsic biological factors we selected adult siblings to control for the potentially  
358 confounding age factor and to minimize the genetic differences among individuals in this  
359 experiment. All animals used in our experiments were also fed on the same diet and  
360 maintained under identical conditions. Microbiota is important extrinsic factor profoundly  
361 influencing host biology particularly by interacting with the host immune system.

362

363 Our results in terms of the composition of Axolotl microbiota broadly parallel the  
364 previous reports on microbiota profile of amphibians, and salamanders in particular. Five  
365 major dominating phyla, Firmicutes, Bacteroidetes, Proteobacteria, Verrucomicrobia and  
366 Actinobacteria were abundant among all studied samples, which is consistent with  
367 previous amphibian studies<sup>32,51-54</sup>. Salamander microbiota was previously studied but  
368 often distinct species of salamander skin microbiota was profiled<sup>51,53</sup> and systematic  
369 investigation of microbiota diversity in multiple organs of salamander species,  
370 particularly that of Axolotl, has been missing in the literature with few exception. Bletz *et*  
371 *al.* (2016) characterized both gut and skin microbiota of fire salamanders within the  
372 natural habitat. Surprisingly, like captive Axolotl in this study, the wild salamanders' gut  
373 and skin are associated with the above mentioned five major phyla. The genera  
374 *Chryseobacterium*, *Pseudomonas*, *Flavobacterium*, *Sphingobacterium*,  
375 *Novosphingobium*, were reported to be dominant taxa in skin of fire salamander living in  
376 nature. Interestingly, we detected these genera in the neotenic skin samples in this study  
377 albeit in low abundance but substantially increased in abundance in the metamorphic  
378 skin. These bacterial genera belong to a large, ecologically diverse group, and their  
379 members include known pathogens; some could be opportunistic while some others can  
380 outcompete emerging fungal pathogens<sup>55</sup>. Interestingly, our analysis revealed that  
381 metamorphic Axolotl skin was dominated by *Pseudonocardia* (15.7% ± 10.4), and an  
382 unclassified taxa from *Pseudonocardiaceae* family (9.7% ± 5.7), both are indicator  
383 species of the metamorphic skin (IndVal =0.99,  $p=0.006$ ). *Pseudonocardia spp.* is a well  
384 known antifungal commensal microorganism<sup>56</sup> and colonize on the integument of  
385 fungus-gardening ant species. Recruitment of the members of this genus in high  
386 abundance by metamorphic Axolotl might reflect host-symbiont synergy against

387 pathogenic fungi.

388

389 We sequenced pools of water samples from the Axolotl aquarium (“Aqua”) to identify  
390 water-borne bacterial taxa acquired by Axolotls. Surprisingly, most abundant genera of  
391 Aqua samples (e.g. *Acidovorax*, *Armatimonas*, *Flectobacillus*) were not associated with  
392 Axolotl organs but only a subset of low-abundance bacteria was detected. For example,  
393 *Aquabacterium* abundance in metamorphic skin and neotenic stomach were 3.9% and  
394 7.3%, respectively while its abundance in Aqua sample was 0.1%. Our results are  
395 consistent with previous work reporting amphibian skin may select rare taxa from the  
396 environment<sup>51-53,57,58</sup>. In this study, we found that 89 out of 509 OTUs in Aqua samples  
397 were present in neotenic skin samples while 105 OTUs shared between Aqua and  
398 metamorphic skin samples (see Fig. 6), and 150 shared OTUs with Aqua samples, the  
399 highest among others, with metamorphic stomach samples. Consequently, our results  
400 support the notion that both host and external factors shape the host microbiota but host  
401 genetics applies selective filter.

402

403 Conversely, diet is another crucial factor strongly influencing structure of gut microbiota  
404 of animal host and even dominate host genotype<sup>59</sup>. Although host genotype and diet are  
405 constant in this study, metamorphosis is likely to cause remodeling of epigenetic  
406 landscape in the host genome, which in turn is expected to reshape microbiota. Notably,  
407 fecal samples from the neotenic and metamorphic Axolotls clustered together, albeit  
408 richness in metamorphic fecal samples significantly decreased. We observed that feeding  
409 behavior of the metamorphic Axolotl change during metamorphosis, the animals tend to  
410 eat less often (low appetite), which might account for the decreased fecal diversity.  
411 Although no major restructuring of intestine *via* metamorphosis was apparent as



412 described before <sup>16</sup>, we observed a higher number of goblet cells and thicker mucus layer  
413 in the metamorphic gut tissue compared to neotenic gut (Supplementary Fig. S8). Taken  
414 together, relative influence of diet and host epigenetics seems to be compartmentalized;  
415 diet appears to influence strongly the bacterial diversity in the fecal microbiota in the gut  
416 lumen whereas the host epigenetics (and the resulting changes in transcriptome due to  
417 metamorphosis) seems to play a greater and selective role in gut tissues (crypts). Some  
418 genera, often associated with symbiosis such as *Alistipes* and *Elusimicrobium*, were  
419 differentially enriched in the metamorphic gut tissues whereas neotenic gut tissues were  
420 represented by two genera with *unclassified Clostridiaceae* and *unclassified*  
421 *Enterobacteriaceae*. Surprisingly, the abundance of *Akkermansia* considerably increased  
422 in the metamorphic gut tissues (16%) relative to neotenic gut (9%). *A. muciniphila* within  
423 this genus is known to be a mucin degrading and symbiotic bacterium and the increase in  
424 abundance of this genus is meaningful with increasingly thicker mucus layer we observed  
425 in the metamorphic gut tissue staining.

426

427 Our analysis revealed that Axolotl microbiota to certain extent was “humanized” in  
428 captivity as manifested from similarity of gut and skin microbiota with the human  
429 microbiota, which prompted us to compare predicted functions using PICRUSt <sup>60</sup>, which  
430 is optimized for human microbiota. We found that all samples included in microbiota  
431 analysis were highly similar based on the abundance of predicted microbial genes (40%).  
432 Though further study using shotgun metagenomics technology is warranted, our findings  
433 raise the possibility that deficiency in the microbial community function in a given organ  
434 can be possibly compensated without taxonomic coherence. However, caution should be  
435 exercised in interpreting these results considering the accuracy of the predicted functions  
436 is predicated on the closed reference database, whereas the majority of OTUs in this study

437 were clustered using open reference.

## 438 **Conclusions**

439 Our study shows microbiota inhabiting Axolotl organs considerably restructure upon  
440 metamorphosis and expansion of opportunistic bacteria within Proteobacteria may be  
441 contributing to the reduced limb regenerative capacity. These results must be taken into  
442 consideration when captive Axolotl is employed in regeneration studies. Lack of  
443 systematic studies on Axolotl microbiota has hindered its potential as a fruitful model in  
444 host-microbe interaction studies. Therefore, the data presented here make a significant  
445 contribution for further characterization of a valuable biological model for regeneration,  
446 aging, and stem cell research.

447

## 448 **Methods**

449

### 450 **Ethical statement and experimental design**

451

452 The local ethics committee of the Istanbul Medipol University (IMU) authorized  
453 experimental protocols and animal care conditions (the authorization number: 38828770-  
454 E.7856). All experiments were performed in accordance with relevant guidelines and  
455 regulations. The experimental design followed in this study is depicted in Fig. 1. Briefly,  
456 a total of 48 adult Axolotls (12-15 cm in length, 1 year old) were obtained from the  
457 animal care facility of the IMU. Axolotls were chosen from among the siblings. Out of  
458 48 Axolotls 30 were reserved for amputation/limb regeneration experiments; and 18 out  
459 of 48 were used for metamorphosis experiments; half of both groups (15 for regeneration  
460 experiments and 9 for metamorphosis; 24 total) were then induced individually to  
461 undergo metamorphosis by L-thyroxine (Sigma-Aldrich, St Louis, MO, USA, Cat. No.

462 T2376) as described elsewhere <sup>25</sup>. Briefly, T4 solution was prepared by dissolving L-  
463 thyroxine in Holtfreter's solution (final concentration 50 nM) and was administrated to  
464 animals that were maintained individually throughout the experimental period. The  
465 medium was replaced with freshly prepared T4 containing solution every third day and  
466 animals were monitored for morphological changes. Administration of the hormone  
467 continued for another 3 weeks until fully metamorphic Axolotls were obtained. Both  
468 neotenic and metamorphic animals were maintained in individual aquaria water at  $18 \pm 2$   
469 °C in Holtfreter's solution. Axolotls were maintained in the university animal facility  
470 within a batch-flow aquarium system where the batch water was treated with UV light  
471 and filtered to prevent infections. All animals were kept in the same aquatic solution and  
472 fed with same diet. Animals were fed once a day using a staple food (JBL Novo LotIM,  
473 Neuhofen, Germany). Axolotls did not receive any antibiotic treatment throughout the  
474 experiments.

475

#### 476 **Sample collection**

477

478 Animals were sacrificed using 0.2% MS222 (Sigma-Aldrich, St Louis, MO, USA. Cat.  
479 No. E10521) approximately in two months upon visual observation of metamorphosis.  
480 Neotenic and metamorphic animals formed two major experimental groups. Randomly  
481 selected three animals were grouped to have three replicates (R1, R2 and R3) for neotenic  
482 and metamorphic experimental groups (Fig. 1). For each replicate skin, stomach, intestine  
483 and fecal samples were harvested from three animals and pooled together under sterile  
484 conditions in a bio safety cabin. To collect the skin samples, animals were rinsed in sterile  
485 water to get rid of the transient bacteria. As the next step, skin samples from the mid  
486 stylopod level of the right forelimb were isolated for each replicates with punch biopsy

487 using disposable and sterile 6 mm diameter punches (Miltex, York, PA, USA). Stomach  
488 and intestine samples were collected after dissection of animals. Intestine contents were  
489 first removed, split into approximately equal 4-5 pieces, and rinsed with sterile serum  
490 physiologic solution five times. Fecal samples were harvested from the rectum. Isolated  
491 and pooled samples for each replicate were frozen in liquid nitrogen immediately for  
492 cryopreservation. All samples were stored at  $-80^{\circ}\text{C}$  till DNA isolation. To compare  
493 harvested samples with the microbial structure of Holtfreter's solution ("Aqua" samples),  
494 water samples from randomly chosen aquariums (n=9) were collected and 3 samples were  
495 pooled together to have three replicates (R1, R2 and R3).

496

#### 497 **Amputation**

498 A total of 30 Axolot were used for regeneration experiments. Half of the animals were  
499 induced to undergo metamorphosis by T4 administration as described above. After  
500 complete metamorphosis was achieved, right forelimb of both neotenic and metamorphic  
501 animals were amputated from the mid-stylopod site Both macroscopic and microscopic  
502 pictures were taken by using Nikon D3200 camera and Zeiss Axio zoom V16  
503 microscope, respectively. Animals were anesthetized in 0.1% MS222 (Sigma-Aldrich, St  
504 Louis, MO, USA. Cat. No. E10521) for all animal procedures.

505

#### 506 **Histology**

507

508 Removal of fecal from the isolated intestine samples was followed by fixation in 10%  
509 neutral buffered formalin (NBF) for 48 h. The samples were then processed by immersion  
510 of materials in ascending alcohol series, toluene and embedding in paraffin. 4  $\mu\text{m}$  thick  
511 tissue sections were obtained by using microtome. Sections were deparaffinized and

512 stained with Hematoxylin and Eosin (Bio-Optica Mayer's Hematoxylin and Eosin Y  
513 Plus), Masson's Trichrome (KIT, Masson Trichrome with aniline blue, Bio Optica, 04-  
514 010802), Alcian Blue (KIT, Alcian Blue Acid Mucopolusaccharides staining, Bio-Optica,  
515 04-160802) according to manufacturer's instructions. Images were taken by using the  
516 NIKON DS-Fi2-U3 Digital Camera. The detailed protocol was described in a previous  
517 work <sup>16</sup>.

518

### 519 **DNA extraction**

520

521 DNA isolation from the skin, intestine, and stomach samples was carried out with  
522 DNeasy Blood & Tissue kit (Qiagen) according to the manufacturer's protocol. QIAamp  
523 DNA Stool Mini Kit (Qiagen) was used to extract the DNA of the fecal samples by  
524 following the manufacturer's recommendations. To extract DNA from the water samples  
525 were first filtered through filters with 0.2 µm pore size and the filter papers subsequently  
526 were used in DNA extractions using metagenomic DNA Isolation Kit for Water  
527 (Epicentre, Cat. No. MGD08420) by following the producer's protocol. Spectramax i3  
528 (Molecular Devices, Sunnyvale, CA) was used to measure the concentrations of isolated  
529 DNA. Quality of DNA samples was checked by electrophoresis in 1.0% agarose gels.

530

### 531 **PCR and sequencing of 16S rRNA amplicons**

532

533 To amplify the variable V3-V4 regions of the 16S rRNA gene, the primers 341F (5'-  
534 CCTACGGGNGGCWGCAG -3') and 805R (5'- GACTACHVGGGTATCTAATCC-3')  
535 were used <sup>61</sup>. MiSeq sequencing adaptor sequences were added to the 5' ends of forward  
536 and reverse primers. Approximately 12.5 ng of purified DNA from each sample was used

537 as a template for PCR amplification in 25  $\mu$ l reaction mixture by using 2x KAPA HiFi  
538 HotStart ReadyMix (Kapa Biosystems, MA, USA). For PCR amplification, the following  
539 conditions were followed: denaturation at 95°C for 3 min., followed by 25 cycles of  
540 denaturation at 95°C for 30 sec., annealing at 55°C for 30 sec. and extension at 72°C for  
541 30 sec., with a final extension at 72°C for 5 min. No template negative control samples  
542 were included to check PCR contamination and none of the negative controls yielded  
543 detectable level of amplification on agarose gels. Amplified PCR products were purified  
544 with Agencourt AMPure XP purification system (Beckman Coulter) and Nextera PCR  
545 was performed by using sample-specific barcodes. Constructed Nextera library was then  
546 sequenced by Illumina MiSeq platform using MiSeq Reagent Kit v3.

547

#### 548 **Sequence processing, clustering, and taxonomic assignment**

549

550 To analyze the paired-end sequencing data Quantitative Insights Into Microbial Ecology  
551 (QIIME, v1.9.1) <sup>62</sup> software was used at the Nephela platform (v.1.6, 2016) of the  
552 National Institute of Allergy and Infectious Diseases (NIAID, Bethesda, MD). Nephela  
553 platform was also used for the Phylogenetic investigation of communities by  
554 reconstruction of unobserved states (PICRUST) analysis <sup>60</sup> and for comparing the data  
555 with the Human Microbiome Project (HMP). Before submitting the raw reads into the  
556 Nephela pipeline, primers were removed using cutadapt program <sup>63</sup> and the pipeline was  
557 stringently configured to perform the following steps; reads below average quality scores  
558 ( $q < 30$ ) and read-length  $> 450$  bp were eliminated. After joining the pair-end reads, the  
559 reads were clustered into operational taxonomic units (OTUs) using open reference OTU-  
560 picking strategy <sup>64</sup>. The open-reference approach initially runs a closed-reference step.  
561 Sequences that fail closed-reference assignment are then clustered as *de novo* OTU based

562 on pairwise similarity among all sequences in the data set. Open reference clustering was  
563 performed based on the 97% clustered SILVA reference (SILVA 123 release; ) database  
564 <sup>65</sup> and SortMeRNA combined with SUMACLUST algorithms <sup>66</sup>. Non-matching reads to  
565 closed reference were subsequently clustered *de novo*. After obtaining the OTU table  
566 from the pipeline, UCHIME (v.4.2) program (<http://drive5.com/uchime>) integrated into  
567 the Mothur (v.1.39.5) tool <sup>67</sup> was separately run to remove chimeric reads. Additionally,  
568 The RDP classifier <sup>68</sup> (v. 2.2) was locally run to assign taxonomy for each OTU at a  
569 confidence greater than 70% cutoff. Reads that could not be classified at the genus level  
570 were sequentially assigned to higher taxonomic hierarchy up to the kingdom level.  
571 Unclassified reads at the kingdom level (“Unclassified Bacteria”) were extracted from the  
572 OTU-representative sequences and searched for nearest neighbor method using MOLE-  
573 BLAST <sup>69</sup>. This tool computes a multiple sequence alignment (MSA) between the query  
574 sequences along with their top BLAST database hits, and generates a phylogenetic tree.  
575 Species richness and diversity were estimated by QIIME with the following alpha  
576 diversity metrics: OTU richness, Chao1, Shannon, Simpson E, Inverse Simpson, and  
577 Faith’s phylogenetic diversity (PD). We assessed normality of alpha diversity data using  
578 Shapiro-Wilk tests and compared the metrics between neotenic and metamorphic  
579 microbiota using unpaired two-tailed *t*-test. Venn diagrams were constructed using jvenn,  
580 a web based tool (<http://jvenn.toulouse.inra.fr>) <sup>70</sup>.

581

## 582 **Multivariate analysis of community structures and diversity**

583

584 Bray–Curtis similarity index <sup>71</sup> and Jaccard index of similarity <sup>72</sup> were used to obtain  
585 distance matrix after standardizing by the column sums and transforming (square-root)  
586 the read abundance data. Similarities in microbial community structures among samples

587 were first displayed using principal coordinate analysis (PCO) (unconstrained).  
588 Differences in community structure related to metamorphosis were displayed using a  
589 constrained ordination technique, Canonical Analysis of Principal coordinates (CAP).  
590 Tests of the multivariate null hypotheses of no differences among a priori defined groups  
591 were examined using PERMANOVA and the CAP classification success rate. CAP uses  
592 PCO followed by canonical discriminant analysis to provide a constrained ordination that  
593 maximizes the differences among a priori groups and reveals patterns that cannot be  
594 unraveled using unconstrained ordinations<sup>73</sup>. CAP classification success rates and CAP  
595  $\text{trace}_{Q\_m0HQ\_m}$  statistics were examined in combination to draw conclusions about  
596 separation of a priori groups. Permutational analysis of multivariate dispersions  
597 (PERMDISP)<sup>74</sup> was used to test for heterogeneity of community structure in a priori  
598 groups. PERMANOVA, CAP and PERMDISP were performed with 9999 permutations  
599 and run as routines in PRIMER6<sup>75</sup>.

600

601 To delineate bacterial taxa responsible for the multivariate patterns and differentially  
602 enriched taxa between the neotenic and metamorphic Axolotl organs, we used DESeq2, a  
603 negative Binomial Wald Test<sup>36,37</sup> and indicator species analysis<sup>76</sup>. DESeq2 analysis  
604 results, along with core OTU heatmap, phylum correlation heatmap, and read count  
605 figures were obtained using MicrobiomeAnalyst<sup>77</sup>. To perform indicator species analysis,  
606 R package labdsv was used. Boxplots, barchart, bubbleplots, and heatmaps were  
607 generated using R packages including vegan, ggplot2, heatmap2, Heatplus, reshape,  
608 colormaps, and RcolorBrewer (R Core Team 2016, <http://www.r-project.org>).

609

610

611 **Availability of data and materials**



612 The datasets generated and/or analysed during the current study are available in the  
613 figshare repository: <https://figshare.com/s/b1f232d8d054e0e20f06>

614

## 615 **References**

- 616 1 McFall-Ngai, M. *et al.* Animals in a bacterial world, a new imperative for the  
617 life sciences. *Proc Natl Acad Sci U S A* **110**, 3229-3236,  
618 doi:10.1073/pnas.1218525110 (2013).
- 619 2 Diaz Heijtz, R. *et al.* Normal gut microbiota modulates brain development and  
620 behavior. *Proc Natl Acad Sci U S A* **108**, 3047-3052,  
621 doi:10.1073/pnas.1010529108 (2011).
- 622 3 Hsiao, E. Y. *et al.* Microbiota modulate behavioral and physiological  
623 abnormalities associated with neurodevelopmental disorders. *Cell* **155**,  
624 1451-1463, doi:10.1016/j.cell.2013.11.024 (2013).
- 625 4 Sommer, F. & Backhed, F. The gut microbiota--masters of host development  
626 and physiology. *Nat Rev Microbiol* **11**, 227-238, doi:10.1038/nrmicro2974  
627 (2013).
- 628 5 Kostic, A. D., Howitt, M. R. & Garrett, W. S. Exploring host-microbiota  
629 interactions in animal models and humans. *Genes Dev* **27**, 701-718,  
630 doi:10.1101/gad.212522.112 (2013).
- 631 6 Baumler, A. J. & Sperandio, V. Interactions between the microbiota and  
632 pathogenic bacteria in the gut. *Nature* **535**, 85-93, doi:10.1038/nature18849  
633 (2016).
- 634 7 Sekirov, I. *et al.* Antibiotic-induced perturbations of the intestinal microbiota  
635 alter host susceptibility to enteric infection. *Infect Immun* **76**, 4726-4736,  
636 doi:10.1128/IAI.00319-08 (2008).
- 637 8 Johnston, P. R. & Rolff, J. Host and Symbiont Jointly Control Gut Microbiota  
638 during Complete Metamorphosis. *PLOS Pathogens* **11**, e1005246,  
639 doi:10.1371/journal.ppat.1005246 (2015).
- 640 9 Spor, A., Koren, O. & Ley, R. Unravelling the effects of the environment and  
641 host genotype on the gut microbiome. *Nat Rev Micro* **9**, 279-290,  
642 doi:[http://www.nature.com/nrmicro/journal/v9/n4/supinfo/nrmicro254](http://www.nature.com/nrmicro/journal/v9/n4/supinfo/nrmicro2540_S1.html)  
643 [0\\_S1.html](http://www.nature.com/nrmicro/journal/v9/n4/supinfo/nrmicro2540_S1.html) (2011).
- 644 10 Amato, K. R. *et al.* Habitat degradation impacts black howler monkey  
645 (*Alouatta pigra*) gastrointestinal microbiomes. *ISME J* **7**, 1344-1353,  
646 doi:10.1038/ismej.2013.16 (2013).
- 647 11 Bletz, M. C. *et al.* Host Ecology Rather Than Host Phylogeny Drives Amphibian  
648 Skin Microbial Community Structure in the Biodiversity Hotspot of  
649 Madagascar. *Frontiers in Microbiology* **8**, 1530,  
650 doi:10.3389/fmicb.2017.01530 (2017).
- 651 12 Shikuma, N. J., Antoshechkin, I., Medeiros, J. M., Pilhofer, M. & Newman, D. K.  
652 Stepwise metamorphosis of the tubeworm *Hydroides elegans* is mediated by  
653 a bacterial inducer and MAPK signaling. *Proc Natl Acad Sci U S A* **113**, 10097-  
654 10102 (2016).

- 655 13 Kikuyama, S., Kawamura, K., Tanaka, S. & Yamamoto, K. Aspects of amphibian  
656 metamorphosis: hormonal control. *Int Rev Cytol* **145**, 105-148 (1993).
- 657 14 Tata, J. R. Amphibian metamorphosis as a model for the developmental  
658 actions of thyroid hormone. *Molecular and Cellular Endocrinology* **246**, 10-20,  
659 doi:<https://doi.org/10.1016/j.mce.2005.11.024> (2006).
- 660 15 Brown, D. D. & Cai, L. Amphibian metamorphosis. *Dev Biol* **306**, 20-33,  
661 doi:10.1016/j.ydbio.2007.03.021 (2007).
- 662 16 Demircan, T. *et al.* A histological atlas of the tissues and organs of neotenic  
663 and metamorphosed axolotl. *Acta Histochemica* **118**, 746-759,  
664 doi:<https://doi.org/10.1016/j.acthis.2016.07.006> (2016).
- 665 17 Hourdry, J., L'Hermite, A. & Ferrand, R. Changes in the Digestive Tract and  
666 Feeding Behavior of Anuran Amphibians during Metamorphosis.  
667 *Physiological Zoology* **69**, 219-251 (1996).
- 668 18 Stevens, C. E. & Hume, I. D. *Comparative physiology of the vertebrate digestive*  
669 *system*. (Cambridge University Press  
670 , 2004).
- 671 19 Boulange, C. L., Neves, A. L., Chilloux, J., Nicholson, J. K. & Dumas, M. E. Impact  
672 of the gut microbiota on inflammation, obesity, and metabolic disease.  
673 *Genome Med* **8**, 42, doi:10.1186/s13073-016-0303-2 (2016).
- 674 20 den Besten, G. *et al.* The role of short-chain fatty acids in the interplay  
675 between diet, gut microbiota, and host energy metabolism. *J. Lipid Res.* **54**,  
676 2325-2340, doi:10.1194/jlr.R036012 (2013).
- 677 21 Musso, G., Gambino, R. & Cassader, M. Interactions Between Gut Microbiota  
678 and Host Metabolism Predisposing to Obesity and Diabetes. *Annual Review of*  
679 *Medicine* **62**, 361-380, doi:10.1146/annurev-med-012510-175505 (2011).
- 680 22 Roy, S. & Gatién, S. Regeneration in axolotls: a model to aim for! *Experimental*  
681 *Gerontology* **43**, 968-973, doi:<https://doi.org/10.1016/j.exger.2008.09.003>  
682 (2008).
- 683 23 Oviedo, N. J. & Beane, W. S. Regeneration: The origin of cancer or a possible  
684 cure? *Semin Cell Dev Biol* **20**, 557-564, doi:10.1016/j.semcdb.2009.04.005  
685 (2009).
- 686 24 Denis, J.-F., Lévesque, M., Tran, S. D., Camarda, A.-J. & Roy, S. Axolotl as a  
687 Model to Study Scarless Wound Healing in Vertebrates: Role of the  
688 Transforming Growth Factor Beta Signaling Pathway. *Advances in Wound*  
689 *Care* **2**, 250-260, doi:10.1089/wound.2012.0371 (2013).
- 690 25 Page, R. B. & Voss, S. R. Induction of metamorphosis in axolotls (*Ambystoma*  
691 *mexicanum*). *Cold Spring Harb Protoc* **2009**, pdb prot5268,  
692 doi:10.1101/pdb.prot5268 (2009).
- 693 26 Voss, S. R., Epperlein, H. H. & Tanaka, E. M. *Ambystoma mexicanum*, the  
694 axolotl: a versatile amphibian model for regeneration, development, and  
695 evolution studies. *Cold Spring Harb Protoc* **2009**, pdb emo128,  
696 doi:10.1101/pdb.emo128 (2009).
- 697 27 Bryant, D. M. *et al.* A tissue-mapped axolotl de novo transcriptome enables  
698 identification of limb regeneration factors. *Cell reports* **18**, 762-776,  
699 doi:10.1016/j.celrep.2016.12.063 (2017).
- 700 28 Jiang, P. *et al.* Analysis of embryonic development in the unsequenced axolotl:  
701 Waves of transcriptomic upheaval and stability. *Dev Biol* **426**, 143-154,  
702 doi:10.1016/j.ydbio.2016.05.024 (2017).

- 703 29 Keinath, M. C. *et al.* Initial characterization of the large genome of the  
704 salamander *Ambystoma mexicanum* using shotgun and laser capture  
705 chromosome sequencing. *Scientific Reports* **5**, 16413, doi:10.1038/srep16413  
706 <https://www.nature.com/articles/srep16413-supplementary-information> (2015).
- 707 30 King, B. L. & Yin, V. P. A Conserved MicroRNA Regulatory Circuit Is  
708 Differentially Controlled during Limb/Appendage Regeneration. *PLOS ONE*  
709 **11**, e0157106, doi:10.1371/journal.pone.0157106 (2016).
- 710 31 Wu, H. J. & Wu, E. The role of gut microbiota in immune homeostasis and  
711 autoimmunity. *Gut Microbes* **3**, 4-14, doi:10.4161/gmic.19320 (2012).
- 712 32 McKenzie, V. J., Bowers, R. M., Fierer, N., Knight, R. & Lauber, C. L. Co-habiting  
713 amphibian species harbor unique skin bacterial communities in wild  
714 populations. *ISME J* **6**, 588-596, doi:10.1038/ismej.2011.129 (2012).
- 715 33 Monaghan, J. R. *et al.* Experimentally induced metamorphosis in axolotls  
716 reduces regenerative rate and fidelity. *Regeneration* **1**, 2-14,  
717 doi:10.1002/reg2.8 (2014).
- 718 34 Lynch, M. D. J. & Neufeld, J. D. Ecology and exploration of the rare biosphere.  
719 *Nat Rev Micro* **13**, 217-229, doi:10.1038/nrmicro3400 (2015).
- 720 35 Bent, S. J. & Forney, L. J. The tragedy of the uncommon: understanding  
721 limitations in the analysis of microbial diversity. *ISME J* **2**, 689-695,  
722 doi:10.1038/ismej.2008.44 (2008).
- 723 36 Love, M. I., Huber, W. & Anders, S. Moderated estimation of fold change and  
724 dispersion for RNA-seq data with DESeq2. *Genome Biol* **15**, 550,  
725 doi:10.1186/s13059-014-0550-8 (2014).
- 726 37 McMurdie, P. J. & Holmes, S. Waste Not, Want Not: Why Rarefying  
727 Microbiome Data Is Inadmissible. *PLOS Computational Biology* **10**, e1003531,  
728 doi:10.1371/journal.pcbi.1003531 (2014).
- 729 38 Donaldson, G. P., Lee, S. M. & Mazmanian, S. K. Gut biogeography of the  
730 bacterial microbiota. *Nature reviews. Microbiology* **14**, 20-32,  
731 doi:10.1038/nrmicro3552 (2016).
- 732 39 Seifert, A. W., Monaghan, J. R., Voss, S. R. & Maden, M. Skin Regeneration in  
733 Adult Axolotls: A Blueprint for Scar-Free Healing in Vertebrates. *PLoS ONE* **7**,  
734 e32875, doi:10.1371/journal.pone.0032875 (2012).
- 735 40 Arnold, C. P. *et al.* Pathogenic shifts in endogenous microbiota impede tissue  
736 regeneration via distinct activation of TAK1/MKK/p38. *Elife* **5**,  
737 doi:10.7554/eLife.16793 (2016).
- 738 41 Godwin, J. W., Pinto, A. R. & Rosenthal, N. A. Macrophages are required for  
739 adult salamander limb regeneration. *Proceedings of the National Academy of*  
740 *Sciences of the United States of America* **110**, 9415-9420,  
741 doi:10.1073/pnas.1300290110 (2013).
- 742 42 Mescher, A. L. Macrophages and fibroblasts during inflammation and tissue  
743 repair in models of organ regeneration. *Regeneration* **4**, 39-53,  
744 doi:10.1002/reg2.77 (2017).
- 745 43 Stramer, B. M., Mori, R. & Martin, P. The inflammation-fibrosis link? A Jekyll  
746 and Hyde role for blood cells during wound repair. *J Invest Dermatol* **127**,  
747 1009-1017, doi:10.1038/sj.jid.5700811 (2007).
- 748 44 Ussing, A. P. & Rosenkilde, P. Effect of Induced Metamorphosis on the  
749 Immune System of the Axolotl, *Ambystoma mexicanum*. *General and*  
750 *Comparative Endocrinology* **97**, 308-319,  
751 doi:<https://doi.org/10.1006/gcen.1995.1031> (1995).

- 752 45 Bales, E. K. *et al.* Pathogenic Chytrid Fungus *Batrachochytrium dendrobatidis*,  
753 but Not *B. salamandrivorans*, Detected on Eastern Hellbenders. *PLOS ONE* **10**,  
754 e0116405, doi:10.1371/journal.pone.0116405 (2015).
- 755 46 Martel, A. *et al.* *Batrachochytrium salamandrivorans* sp. nov. causes lethal  
756 chytridiomycosis in amphibians. *Proceedings of the National Academy of*  
757 *Sciences of the United States of America* **110**, 15325-15329,  
758 doi:10.1073/pnas.1307356110 (2013).
- 759 47 Gardiner, M. *et al.* A longitudinal study of the diabetic skin and wound  
760 microbiome. *PeerJ* **5**, e3543, doi:10.7717/peerj.3543 (2017).
- 761 48 Grice, E. A. *et al.* Longitudinal shift in diabetic wound microbiota correlates  
762 with prolonged skin defense response. *Proc Natl Acad Sci U S A* **107**, 14799-  
763 14804, doi:10.1073/pnas.1004204107 (2010).
- 764 49 Naito, T. *et al.* Lipopolysaccharide from Crypt-Specific Core Microbiota  
765 Modulates the Colonic Epithelial Proliferation-to-Differentiation Balance.  
766 *MBio* **8**, doi:10.1128/mBio.01680-17 (2017).
- 767 50 Wu, X. *et al.* Oral ampicillin inhibits liver regeneration by breaking hepatic  
768 innate immune tolerance normally maintained by gut commensal bacteria.  
769 *Hepatology* **62**, 253-264, doi:10.1002/hep.27791 (2015).
- 770 51 Bletz, M. C. *et al.* Amphibian gut microbiota shifts differentially in community  
771 structure but converges on habitat-specific predicted functions. *Nat Commun*  
772 **7**, 13699, doi:10.1038/ncomms13699 (2016).
- 773 52 Bletz, M. C., Perl, R. G. B. & Vences, M. Skin microbiota differs drastically  
774 between co-occurring frogs and newts. *Royal Society Open Science* **4**, 170107,  
775 doi:10.1098/rsos.170107 (2017).
- 776 53 Sanchez, E. *et al.* Cutaneous Bacterial Communities of a Poisonous  
777 Salamander: a Perspective from Life Stages, Body Parts and Environmental  
778 Conditions. *Microb Ecol* **73**, 455-465, doi:10.1007/s00248-016-0863-0  
779 (2017).
- 780 54 Weng, F. C., Yang, Y. J. & Wang, D. Functional analysis for gut microbes of the  
781 brown tree frog (*Polypedates megacephalus*) in artificial hibernation. *BMC*  
782 *Genomics* **17**, 1024, doi:10.1186/s12864-016-3318-6 (2016).
- 783 55 Lauer, A., Simon, M. A., Banning, J. L., Lam, B. A. & Harris, R. N. Diversity of  
784 cutaneous bacteria with antifungal activity isolated from female four-toed  
785 salamanders. *ISME J* **2**, 145-157, doi:10.1038/ismej.2007.110 (2008).
- 786 56 Sen, R. *et al.* Generalized antifungal activity and 454-screening of  
787 *Pseudonocardia* and *Amycolatopsis* bacteria in nests of fungus-growing ants.  
788 *Proc Natl Acad Sci U S A* **106**, 17805-17810, doi:10.1073/pnas.0904827106  
789 (2009).
- 790 57 Kueneman, J. G. *et al.* The amphibian skin-associated microbiome across  
791 species, space and life history stages. *Mol Ecol* **23**, 1238-1250,  
792 doi:10.1111/mec.12510 (2014).
- 793 58 Walke, J. B. *et al.* Amphibian skin may select for rare environmental microbes.  
794 *ISME J* **8**, 2207-2217, doi:10.1038/ismej.2014.77 (2014).
- 795 59 Carmody, R. N. *et al.* Diet dominates host genotype in shaping the murine gut  
796 microbiota. *Cell Host Microbe* **17**, 72-84, doi:10.1016/j.chom.2014.11.010  
797 (2015).
- 798 60 Langille, M. G. I. *et al.* Predictive functional profiling of microbial communities  
799 using 16S rRNA marker gene sequences. *Nature biotechnology* **31**, 814-821,  
800 doi:10.1038/nbt.2676 (2013).

- 801 61 Walters, W. *et al.* Improved Bacterial 16S rRNA Gene (V4 and V4-5) and  
802 Fungal Internal Transcribed Spacer Marker Gene Primers for Microbial  
803 Community Surveys. *mSystems* **1**, doi:10.1128/mSystems.00009-15 (2016).
- 804 62 Caporaso, J. G. *et al.* QIIME allows analysis of high-throughput community  
805 sequencing data. *Nat Methods* **7**, 335-336, doi:10.1038/nmeth.f.303 (2010).
- 806 63 Martin, M. Cutadapt removes adapter sequences from high-throughput  
807 sequencing reads. *EMBnet.journal* **17**, 10-12 (2011).
- 808 64 Rideout, J. R. *et al.* Subsampled open-reference clustering creates consistent,  
809 comprehensive OTU definitions and scales to billions of sequences. *PeerJ* **2**,  
810 e545, doi:10.7717/peerj.545 (2014).
- 811 65 Quast, C. *et al.* The SILVA ribosomal RNA gene database project: improved  
812 data processing and web-based tools. *Nucleic Acids Res* **41**, D590-596,  
813 doi:10.1093/nar/gks1219 (2013).
- 814 66 Kopylova, E. *et al.* Open-Source Sequence Clustering Methods Improve the  
815 State Of the Art. *mSystems* **1**, doi:10.1128/mSystems.00003-15 (2016).
- 816 67 Schloss, P. D. *et al.* Introducing mothur: Open-Source, Platform-Independent,  
817 Community-Supported Software for Describing and Comparing Microbial  
818 Communities. *Applied and Environmental Microbiology* **75**, 7537-7541,  
819 doi:10.1128/AEM.01541-09 (2009).
- 820 68 Wang, Q., Garrity, G. M., Tiedje, J. M. & Cole, J. R. Naïve Bayesian Classifier for  
821 Rapid Assignment of rRNA Sequences into the New Bacterial Taxonomy.  
822 *Applied and Environmental Microbiology* **73**, 5261-5267,  
823 doi:10.1128/AEM.00062-07 (2007).
- 824 69 Ncbi Resource Coordinators. Database resources of the National Center for  
825 Biotechnology Information. *Nucleic Acids Research* **43**, D6-D17,  
826 doi:10.1093/nar/gku1130 (2015).
- 827 70 Bardou, P., Mariette, J., Escudié, F., Djemiel, C. & Klopp, C. jvenn: an interactive  
828 Venn diagram viewer. *BMC Bioinformatics* **15**, 293, doi:10.1186/1471-2105-  
829 15-293 (2014).
- 830 71 Bray, J. R. & Curtis, J. T. An Ordination of the Upland Forest Communities of  
831 Southern Wisconsin. *Ecological Monographs* **27**, 325-349,  
832 doi:10.2307/1942268 (1957).
- 833 72 Jaccard, P. Nouvelles recherches sur la distribution florale. *Bull. Soc. Vaudoise*  
834 *Sci. Nat.* **44**, 223-270 (1908).
- 835 73 Anderson, M. J. & Willis, T. J. CANONICAL ANALYSIS OF PRINCIPAL  
836 COORDINATES: A USEFUL METHOD OF CONSTRAINED ORDINATION FOR  
837 ECOLOGY. *Ecology* **84**, 511-525, doi:10.1890/0012-  
838 9658(2003)084[0511:CAOPCA]2.0.CO;2 (2003).
- 839 74 Anderson, M. J. Distance-based tests for homogeneity of multivariate  
840 dispersions. *Biometrics* **62**, 245-253, doi:10.1111/j.1541-0420.2005.00440.x  
841 (2006).
- 842 75 Clarke, K. & Gorley, R. N. *Primer v6:User Manual/Tutorial.* (PRIMER-E, 2006).
- 843 76 Dufrière, M. & Legendre, P. SPECIES ASSEMBLAGES AND INDICATOR  
844 SPECIES:THE NEED FOR A FLEXIBLE ASYMMETRICAL APPROACH. *Ecological*  
845 *Monographs* **67**, 345-366, doi:10.1890/0012-  
846 9615(1997)067[0345:SAAIST]2.0.CO;2 (1997).
- 847 77 Dhariwal, A. *et al.* MicrobiomeAnalyst: a web-based tool for comprehensive  
848 statistical, visual and meta-analysis of microbiome data. *Nucleic Acids*  
849 *Research* **45**, W180-W188, doi:10.1093/nar/gkx295 (2017).

850  
851  
852

### 853 **Acknowledgements**

854 This study was financially supported by the Medipol University Research Fund. This  
855 study used the Nephele platform from the National Institute of Allergy and Infectious  
856 Diseases (NIAID) Office of Cyber Infrastructure and Computational Biology (OCICB) in  
857 Bethesda, MD.

858

### 859 **Author contributions statement**

860 TD and SY conceived the study. TD, BY, İK, AEİ and ECF performed animal  
861 experiments. TD, GÖ, and SY acquired sequencing data; TD, GO, and SY analyzed and  
862 interpreted the data. TD, GO, GÖ, and SY drafted and critically reviewed/ revised the  
863 manuscript. All authors read and approved the final manuscript.

864

### 865 **Additional Information**

#### 866 **Competing interests**

867 The authors of this manuscript declare no competing interests.

868

869

870

### 871 **FIGURE LEGENDS**

872 **Figure 1. Experimental design for the comparison of neotenic and metamorphic**  
873 **Axolotl.** Of 48 siblings, a subset of 24 animals (9 animals for metamorphosis and 15

874 animals for regeneration experiments) were randomly selected and induced  
875 metamorphosis by T4 hormone administration while the rest kept untreated in neoteny. 30  
876 animals (15 neotenic and 15 metamorphosed) were used in regeneration experiments and  
877 18 animals (9 neotenic and 9 metamorphic) were housed for microbiome analysis. Each  
878 sample groups for skin, gut, stomach and fecal samples consisted of 3 replicates  
879 following randomization and pooling.

880

881 **Figure 2. Time course of metamorphosis and limb regeneration.** Time course (Day0 -  
882 Day72) after T4 administration showing anatomical changes to adapt terrestrial life  
883 conditions. Metamorphosis-associated characteristics such as weight loss and  
884 disappearance of fin and gills were noticed gradually within this time period. **(a).** Time  
885 course (Day0 - Day64) after limb amputation demonstrating differences between  
886 regenerative capacity of neotenic (upper panel) and metamorphic (lower panel) Axolotl.  
887 Reduction in limb regenerative capacity was observed for metamorphic animals. (n=15  
888 for each group) **(b)**

889

890 **Figure 3. Effect of metamorphosis on bacterial diversity between neotenic and**  
891 **metamorphic Axolotl.** Box plots illustrate the comparison of diversity indices; Observed  
892 (a), Chao1 (b), Shannon (c) and Faith's Phylogenetic Diversity (PD) measures.

893

894 **Figure 4. Beta diversity analysis based on Bray-Curtis distance matrix showing**  
895 **separation of neotenic and metamorphic bacterial communities.** Samples were  
896 compared using PCO (a) and Canonical Analysis of Principal Coordinates (CAP) (b)  
897 methods.

898

899 **Figure 5. Mean relative abundances of 16S rRNA sequences.** Phylum level relative  
900 abundance as bar chart (a), genus level relative abundances shown as heatmap (Individual  
901 taxa displayed if the its abundance in any sample  $\geq 5\%$ ). Samples and bacterial taxa were  
902 clustered using average linkage hierarchical clustering of a distance matrix based on  
903 Bray–Curtis distance and taxa abundances, respectively. Samples from each group were  
904 color coded on the column side bar as follows: Aqua samples (brown); samples from  
905 neotenic Axolotl (light slate blue), metamorphic Axolotl (magenta) (b).

906

907 **Figure 6. Differentially enriched genus level taxa and indicator species in samples**  
908 **from neotenic and metamorphic Axolotl.** The color scale bar indicates log<sub>2</sub> fold  
909 changes for absolute OTU abundances (DESeq2 analysis ( $q < 0.01$ )) (a), Bubble plot  
910 showing indicator species. Only highly significant indicator values (IndVal  $> 0.7$ ,  $q < 0.01$ )  
911 are displayed. Size of bubble symbol is proportional to the mean relative abundance of  
912 indicator OTUs and the color scale bar shows indicator value for each OTU (b).

913

914 **Figure 7. Venn diagrams showing the number of unique and shared OTUs.** Skin and  
915 Aqua samples (a), and gut and fecal samples (b), collected from neotenic and  
916 metamorphic Axolotls as indicated in the diagram.

917

918

919

920



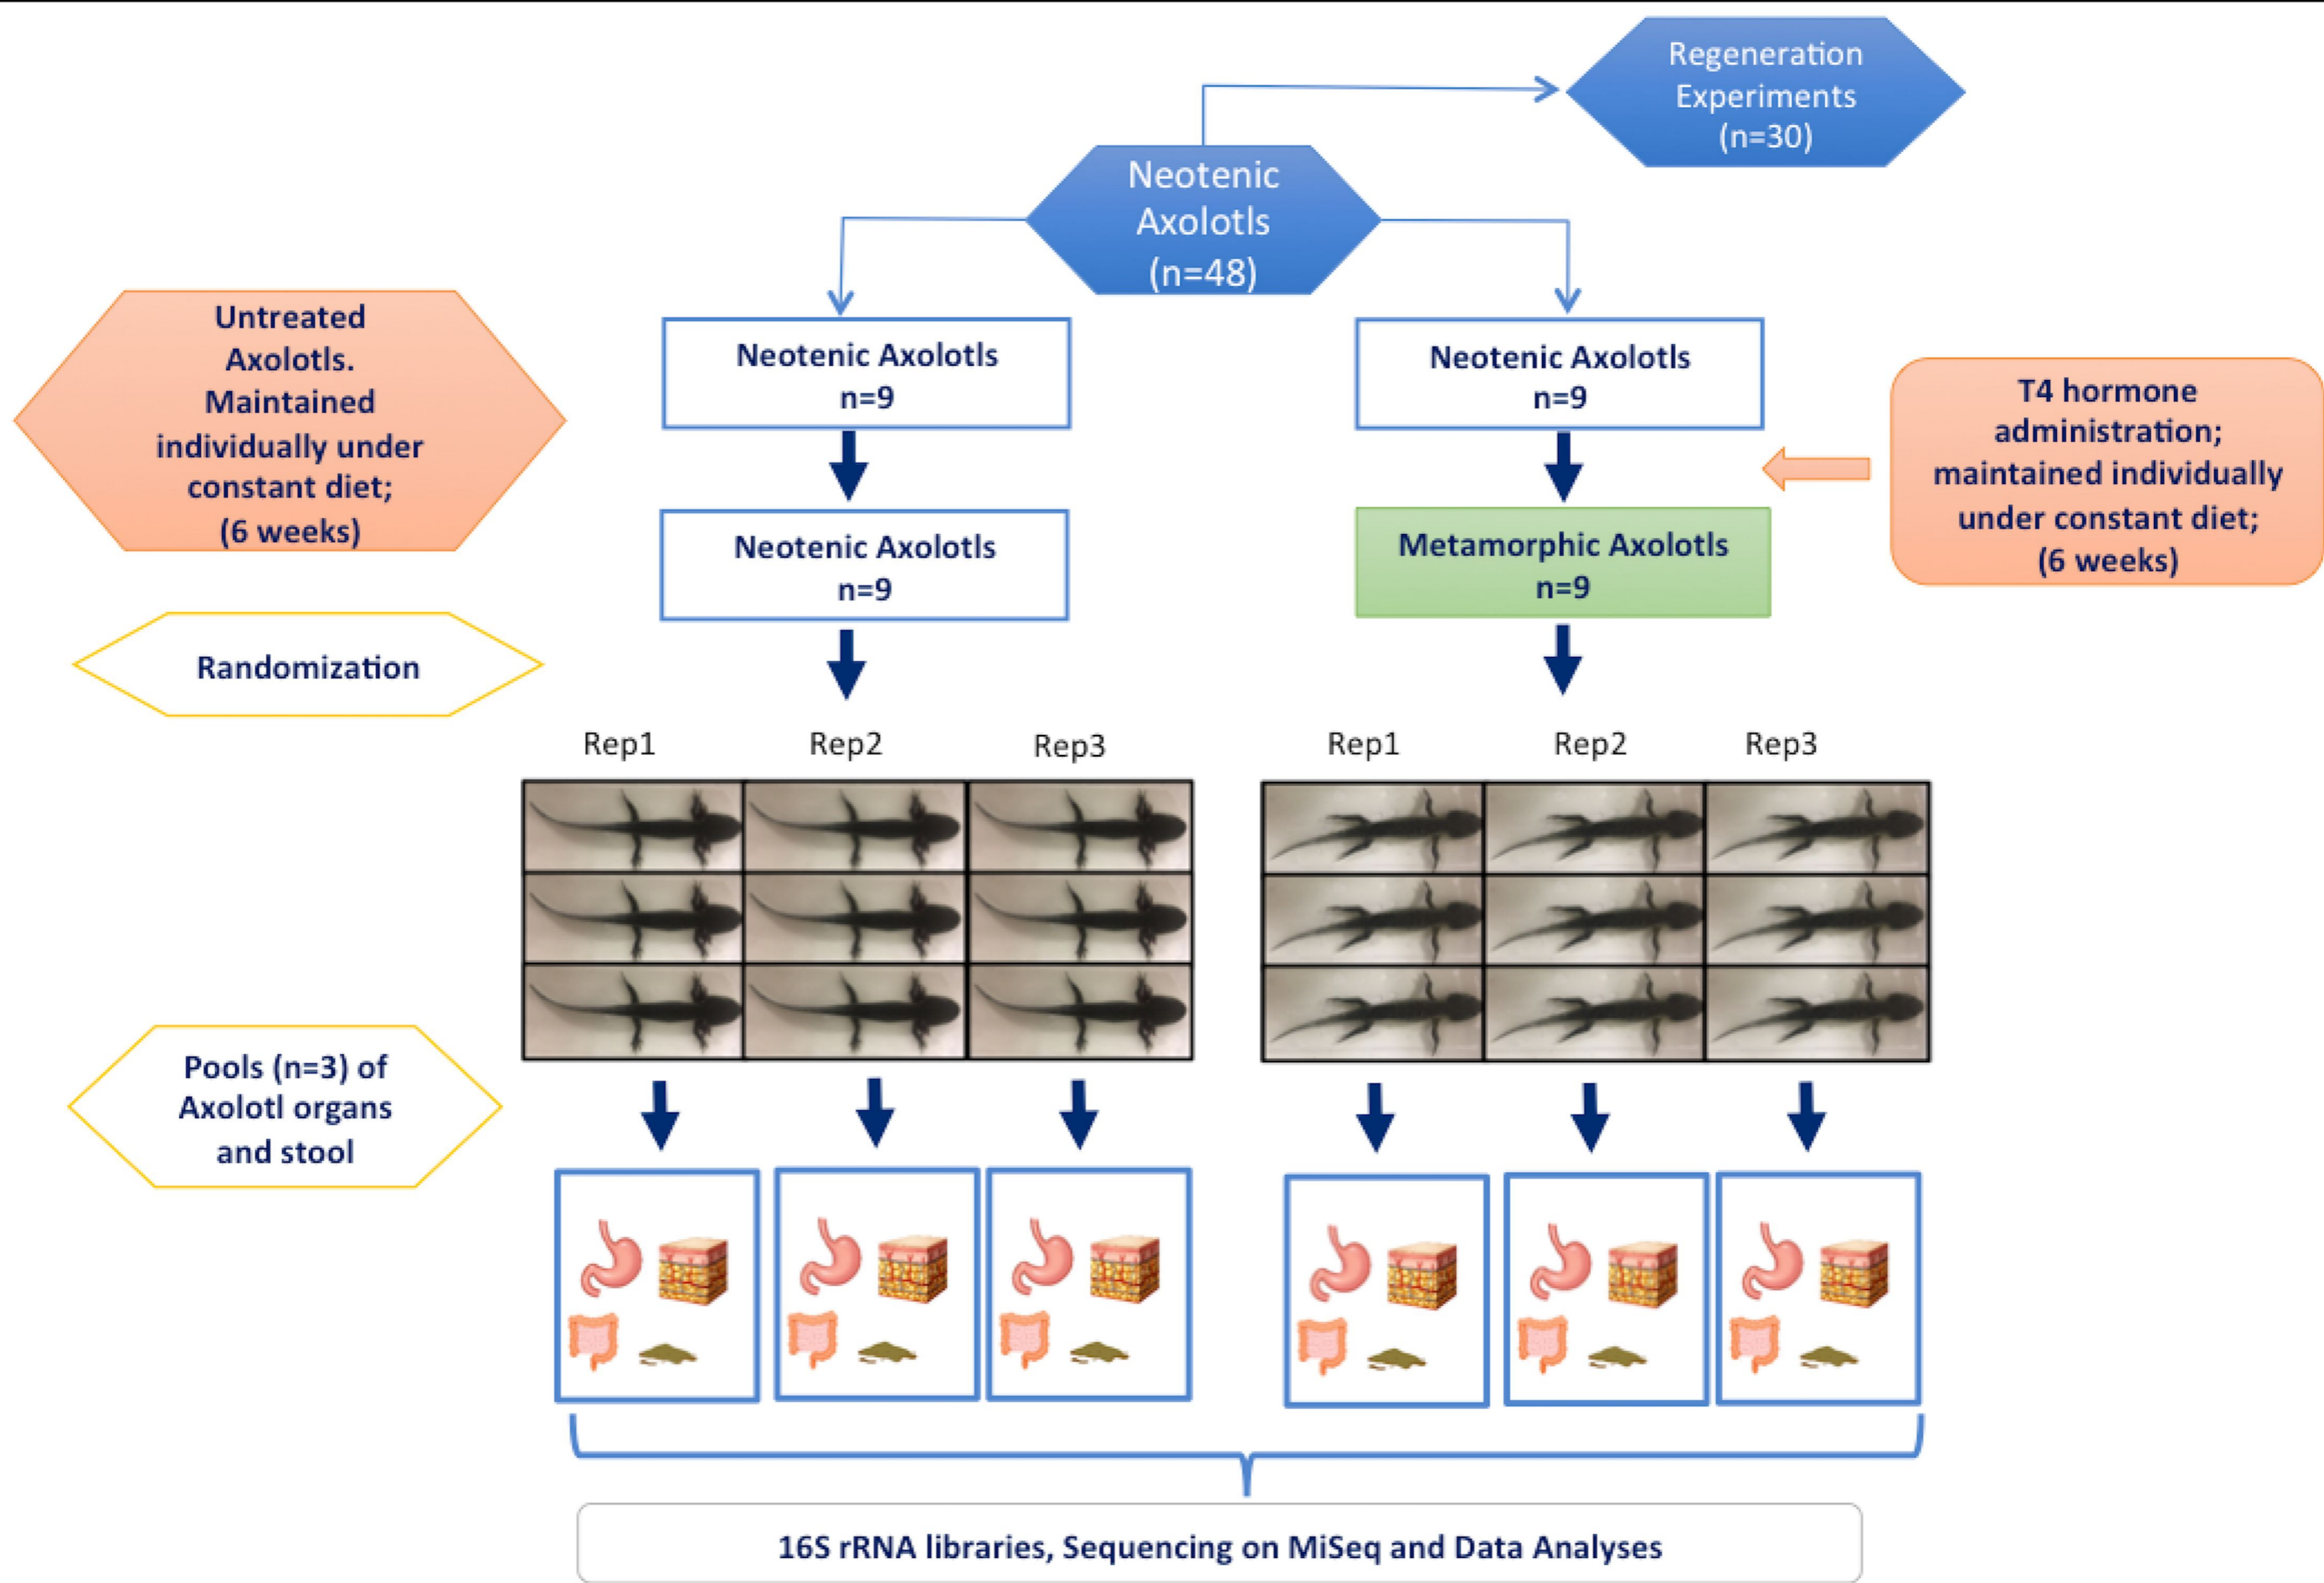

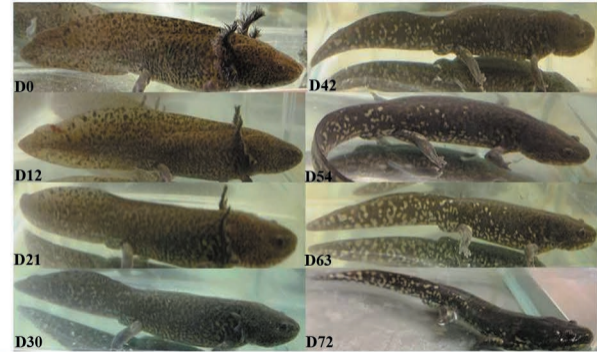

**a**

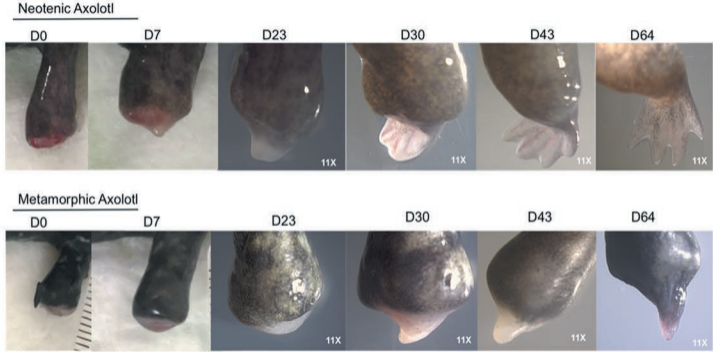

**b**

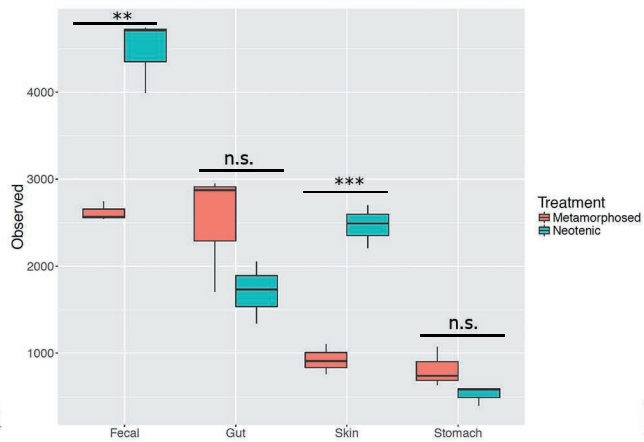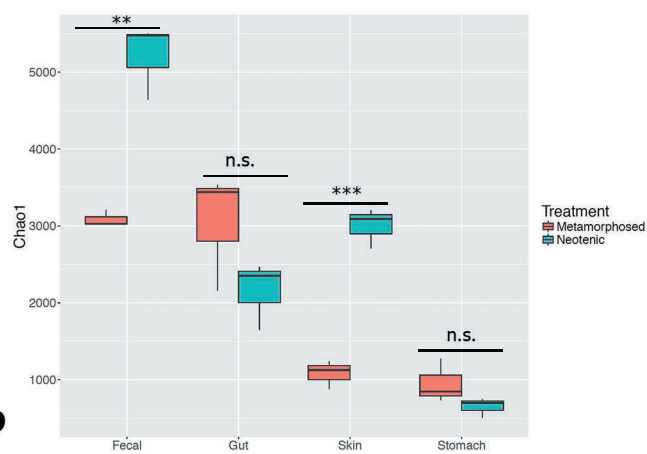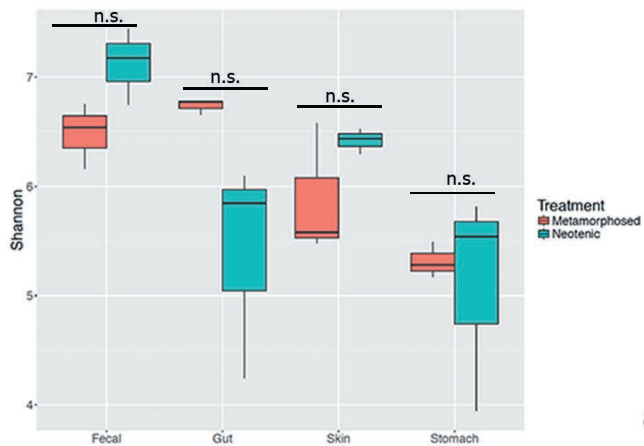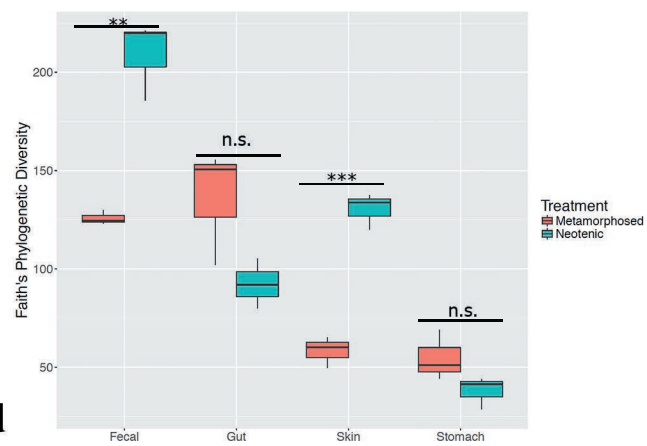

**a**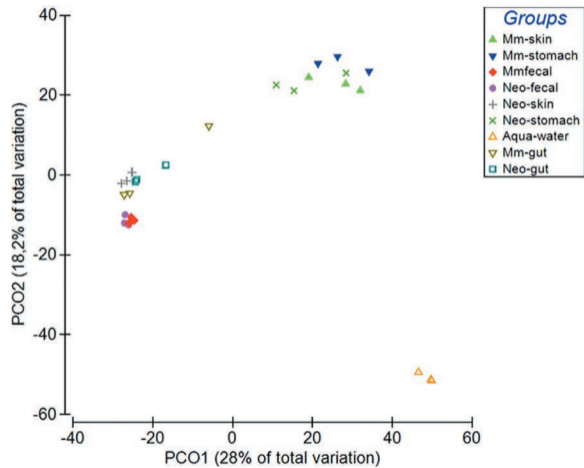**b**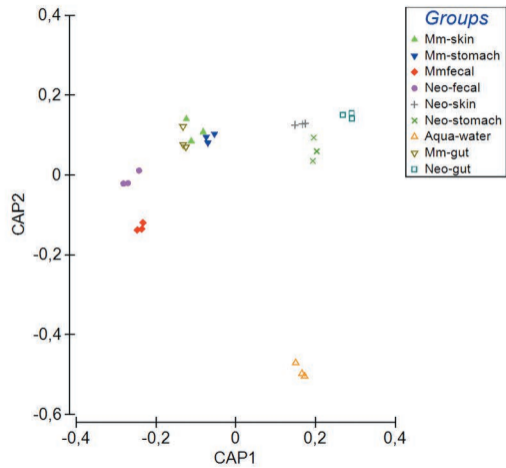

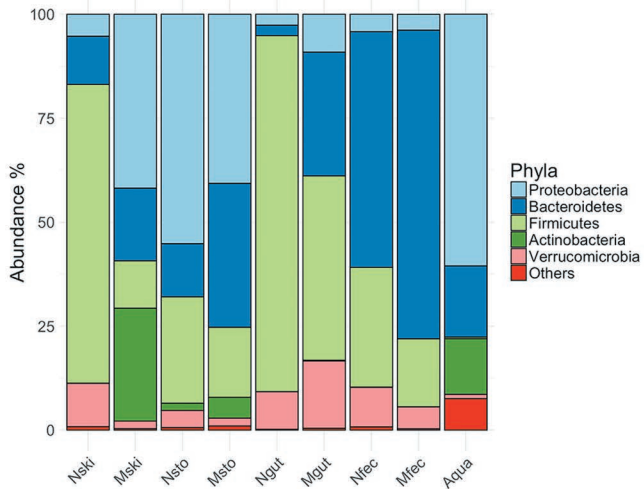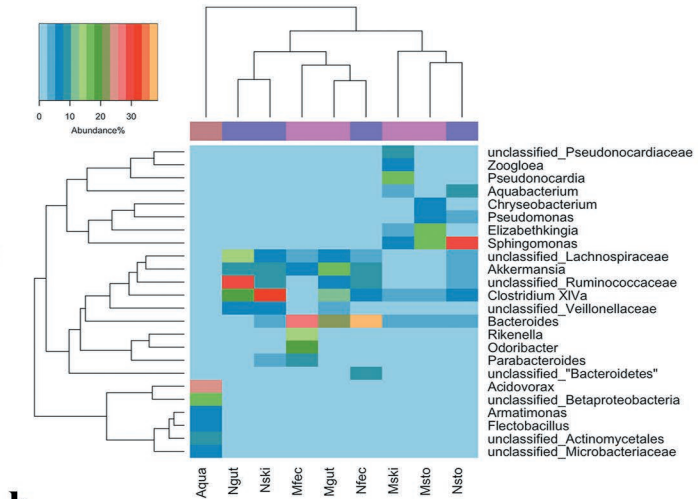

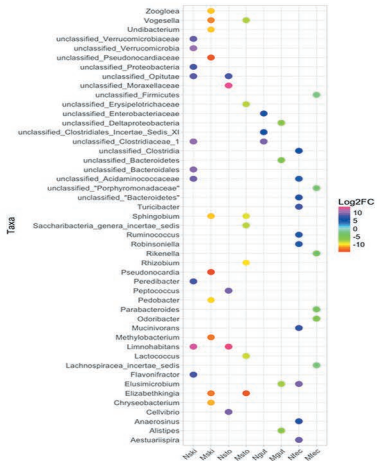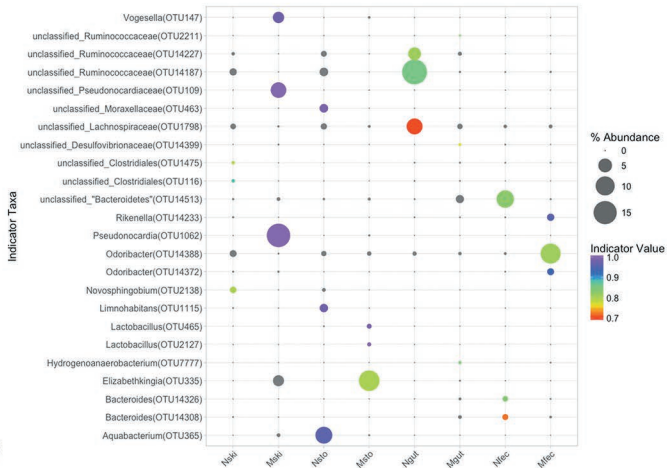

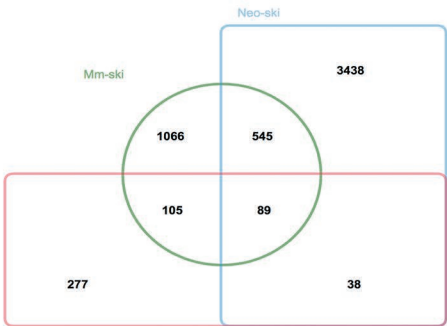

Aqua

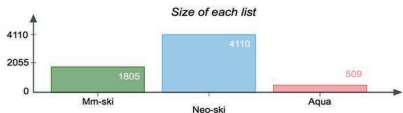

Number of elements: specific (1) or shared by 2, 3, ... lists

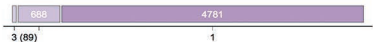

**a**

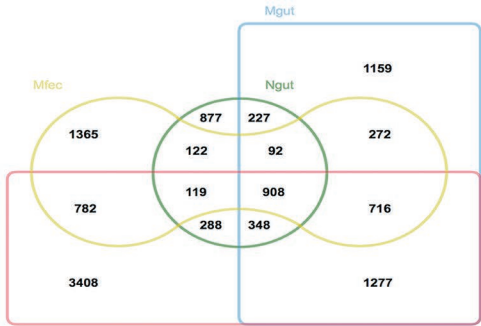

Nfec

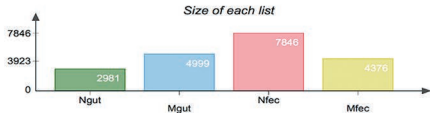

Number of elements: specific (1) or shared by 2, 3, ... lists

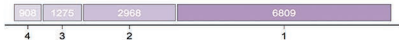

**b**
